# Supplementary material for: Efficient ternary bulk heterojunction organic solar cells using a low-cost nonfullerene acceptor
Source: Royal Society of Chemistry journal article supplement (doi:10.1039/d1tc05653k), 2022-01-01
Supplement: d1tc05653k1.pdf [file d1tc05653k1.pdf]

## Supporting information

### Efficient Ternary Bulk Heterojunction Organic Solar Cells Using A Low-cost Nonfullerene Acceptor

Adrien Schlachter,<sup>1</sup> Gabriel Marineau-Plante,<sup>1</sup> Pierre D. Harvey,<sup>1\*</sup> Anupam Agrawal,<sup>2, 4</sup> Ganesh D. Sharma,<sup>2,3\*</sup>

<sup>1</sup>Departement de chimie, Universite de Sherbrooke, Sherbrooke, PQ, Canada J1K 2R1

<sup>2</sup>Department of Physics, The LNM Institute of Information Technology Jamdoli, Jaipur (Raj.) 302031, India

<sup>3</sup>Department of Electronics and Communication Engineering, The LNM Institute of Information Technology, Jamdoli 302031 Jaipur, India

<sup>4</sup>Department of Electrical and Electronics Engineering, Bhilai Institute Technology, Durg (CG) 491001, India

#### Device Fabrication and Characterization

The solution processed BHJ PSCs (binary as well as ternary active layers) were fabricated with a conventional device structure of indium tin oxide (ITO)/PEDOT:PSS (40 nm)/active layer/ PFN(20 nm) /Al (50 nm). Poly(3,4-ethylenedioxythiophene):poly(styrene sulfonate) (PEDOT:PSS) and Poly[(9,9-bis(3-(N,N-dimethylamino)propyl)-2,7-fluorene)-alt-2,7-(9,9-dioctylfluorene)] (PFN) were used as hole transport layer (HTL) and electron transport layer, respectively. The fabrication details are as follows: ITO coated glass substrates were cleaned before the device fabrication in acetone, detergent, deionized water, isopropyl alcohol in ultrasonic bath, sequentially, and then dried in a vacuum oven. A thin film of PEDOT:PSS was spin-casted onto the ITO coated glass substrates at 3000 rpm for 30 min and then thermally annealed at 120° C for 30 min. The binary and ternary active layers were prepared from the donor **P** and acceptors (PC<sub>71</sub>BM or **Cz-IC**) *via* varying the weight ratio between donor and acceptor with an overall concentration of 16 mg/mL. Then, the solution was spin casted on top of the PEDOT:PSS film and then dried. In order to prepare the ternary active layers, the weight ratio between two acceptors (PC<sub>71</sub>BM and **Cz-IC**) was varied keeping the concentration of donor **P** constant. After the solvent vapor annealing (SVA) exposure, the films were removed from the petri dish and were allowed to dry at room temperature for 1 min. The thickness of the films was about 90 ± 5 nm. A thin film of PFN in methanol solution (0.1 mg/mL) was spin coated on top of the active layer to form the ETL and then dried. Finally, a

thin film of aluminium (Al) was thermally deposited on top of PFN at pressure less than  $1 \times 10^{-5}$  torr with a shadow mask on top of the electrode. The effective area of the devices was 0.16  $\text{cm}^2$ . The power conversion efficiencies of the devices were determined from the current-voltage characteristics measured by Keithley 2400 source meter unit under AM1.5G (100  $\text{mW cm}^{-2}$ ) spectrum from a solar simulator. The incident photon to current conversion efficiency (IPCE) spectra of the PSCs were recorded using Bentham IPCE system (model 300).

The hole mobility and electron mobility of the blended films were estimated by recording the under dark J-V characteristics of *hole only* (ITO/PEDOT:PSS/active layer/Al) and *electron only* (ITO/Al/active layer/Al) and fitting the data with the space charge limited current (SCLC) model.

Cyclic voltammetry (CV) was performed with a three-electrode-compartment cell in  $\text{CH}_2\text{Cl}_2$  solutions with 0.1 M  $[\text{n-Bu}_4\text{N}](\text{ClO}_4)$  as supporting electrolyte using CHI-730D electrochemistry workstation. A glassy carbon electrode of diameter 3 mm was used as the working electrode while platinum wire and Ag/AgCl electrodes were used as the counter and reference electrodes respectively.

X-ray diffraction (XRD) measurement was carried out using XRD Panalytical make. The thin film of the active layer (SVA treated) were deposited on the glass substrates (100 nm) and measurement was carried out in plane geometry.  $\text{CuK}\alpha$  X-radiation is used as incident radiation. Transmission electron microscopy images were recorded on Tecnai G2 20 S-TWIN [FEI 200 Kv TEM equipment].

**Table S1.** Photovoltaic parameters of the as cast **P:PC<sub>71</sub>BM** based OSCs with different weight ratios between **P** and **PC<sub>71</sub>BM**.

| P:PC <sub>71</sub> BM weight ratio | J <sub>SC</sub> (mA/cm <sup>2</sup> ) | V <sub>OC</sub> (V) | FF   | PCE (%) |
|------------------------------------|---------------------------------------|---------------------|------|---------|
| 1:0.5                              | 12.41                                 | 0.77                | 0.51 | 4.87    |
| 1:1.0                              | 13.76                                 | 0.78                | 0.53 | 5.69    |
| 1:1.4                              | 14.38                                 | 0.78                | 0.56 | 6.28    |
| 1:1.5                              | 13.82                                 | 0.79                | 0.53 | 5.79    |

**Table S2.** Photovoltaic parameters of the as cast **P:Cz-IC** based OSCs with different weight ratios between **P** and **Cz-IC**.

| P:Cz-IC weight ratio | J <sub>SC</sub> (mA/cm <sup>2</sup> ) | V <sub>OC</sub> (V) | FF   | PCE (%) |
|----------------------|---------------------------------------|---------------------|------|---------|
| 1:0.4                | 13.96                                 | 1.01                | 0.47 | 6.62    |
| 1:0.8                | 15.17                                 | 1.00                | 0.50 | 7.58    |
| 1:1.2                | 16.38                                 | 1.02                | 0.52 | 8.69    |

|       |       |      |      |      |
|-------|-------|------|------|------|
| 1:1.3 | 15.72 | 1.01 | 0.49 | 7.78 |
|-------|-------|------|------|------|

**Table S3.** Photovoltaic parameters of the as cast P:PC<sub>71</sub>BM/Cz-IC ternary OSCs with different weight ratios between PC<sub>71</sub>BM and Cz-IC.

| PC <sub>71</sub> BM:Cz-IC weight ratio | J <sub>SC</sub> (mA/cm <sup>2</sup> ) | V <sub>OC</sub> (V) | FF   | PCE (%) |
|----------------------------------------|---------------------------------------|---------------------|------|---------|
| 0.1:1.1                                | 18.38                                 | 0.96                | 0.61 | 10.76   |
| 0.2:1.0                                | 19.45                                 | 0.95                | 0.65 | 12.01   |
| 0.3: 0.9                               | 18.38                                 | 0.96                | 0.62 | 10.94   |

**Table S4.** HOMO and LUMO energy levels of the blend with different weight ratios of PC<sub>71</sub>BM and Cz-IC.

| PC <sub>71</sub> BM:Cz-IC (weight ratio) | HOMO (eV) | LUMO (eV) |
|------------------------------------------|-----------|-----------|
| 0:1                                      | -5.98     | -3.77     |
| 0.2:0.8                                  | -6.02     | -3.88     |
| 0.4:0.6                                  | -6.06     | -3.92     |
| 0.6:0.4                                  | -6.08     | -4.02     |
| 1:0                                      | -6.10     | 4.12      |

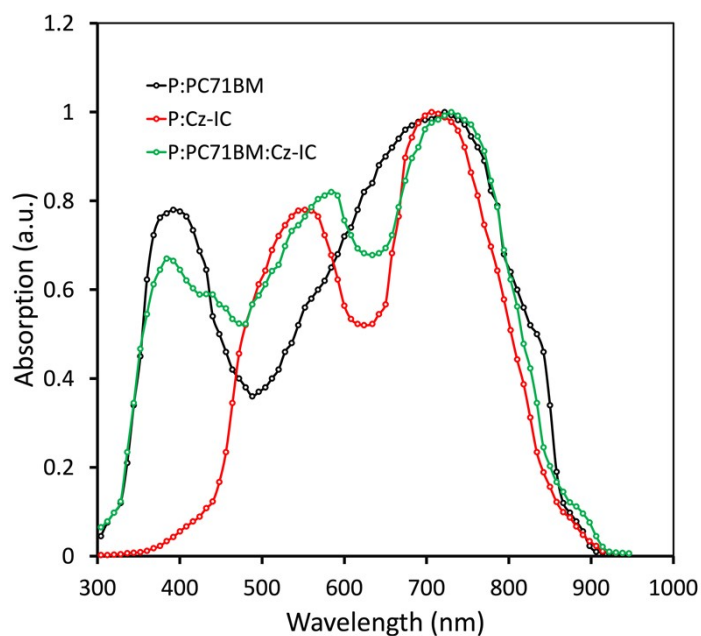

**Fig S1.** Optical absorption spectra of binary and ternary thin films

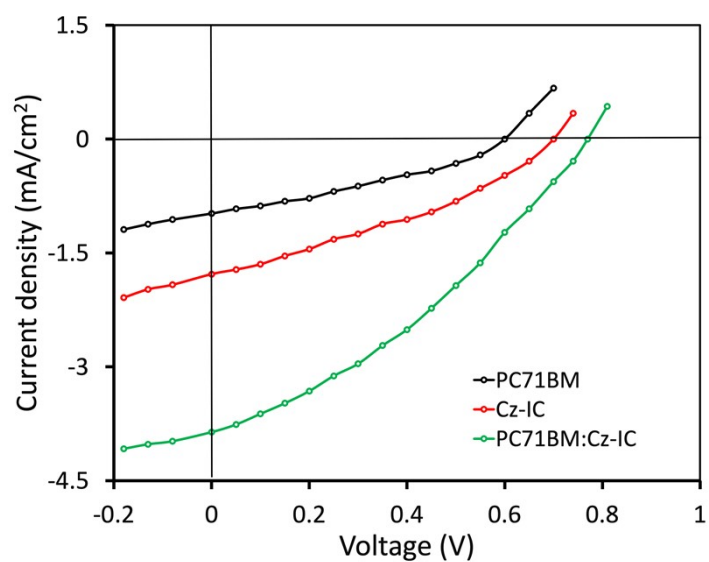

**Fig S2.** J-V characteristics of the devices based in pristine PC<sub>71</sub>BM, Cz-IC and PC<sub>71</sub>:BM:Cz-IC blend as active layer

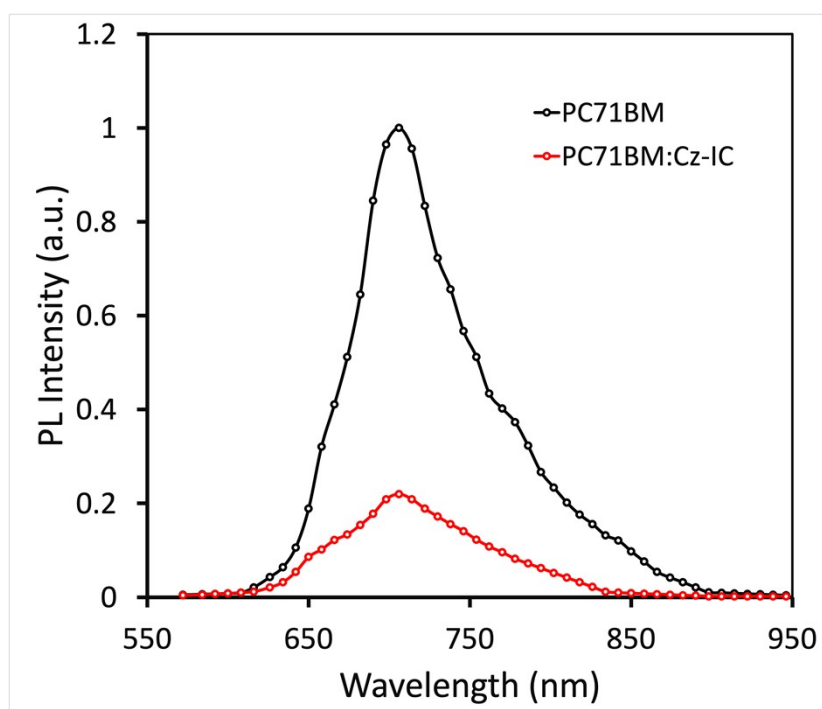

**Fig S3.** PL spectra of the pristine PC<sub>71</sub>BM and PC<sub>71</sub>BM:Cz-IC blend excited at 500 nm.

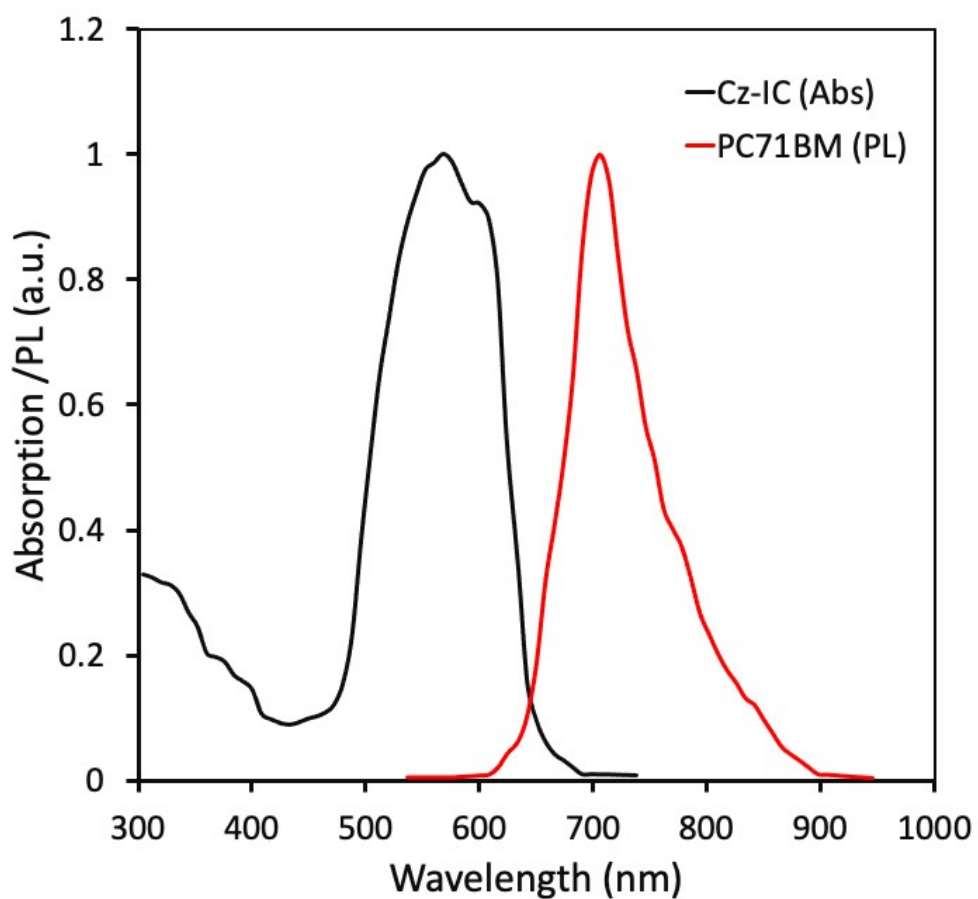

**Fig. S4** Absorption spectra (film) of Cz-IC and PL spectra (film) of PC<sub>71</sub>BM.

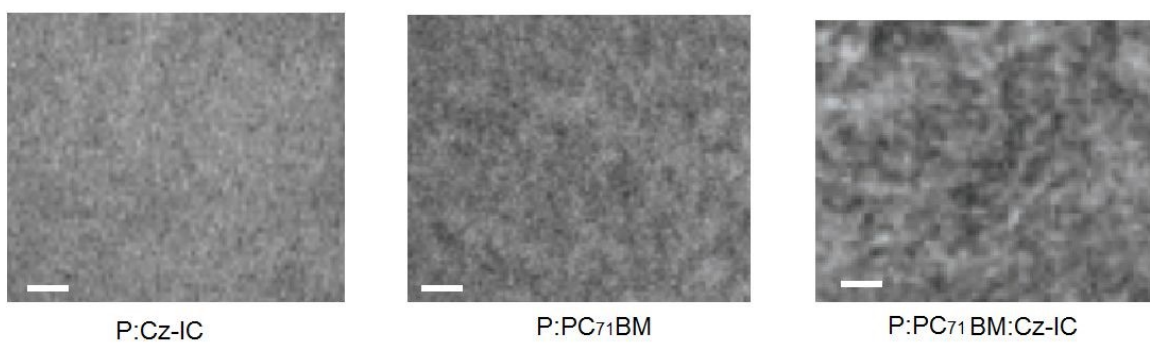

**Fig. S5.** TEM images of **P:Cz-IC**, **P:PC<sub>71</sub>BM** and **P:PC<sub>71</sub>BM/Cz-IC** thin films. Scale bar is 100 nm.
